# Supplementary material for: COVID-19 Breakthrough Infection after Inactivated Vaccine Induced Robust Antibody Responses and Cross-Neutralization of SARS-CoV-2 Variants, but Less Immunity against Omicron
Source: MDPI journal article supplement (doi:10.3390/vaccines10030391), 2022-03-03
Supplement: s1 [file s1]

## Supplementary Information

**Figure S1.** Percentage of SARS-CoV-2 variants circulating in Thailand between 21 April 2021 and 20 September 2021.

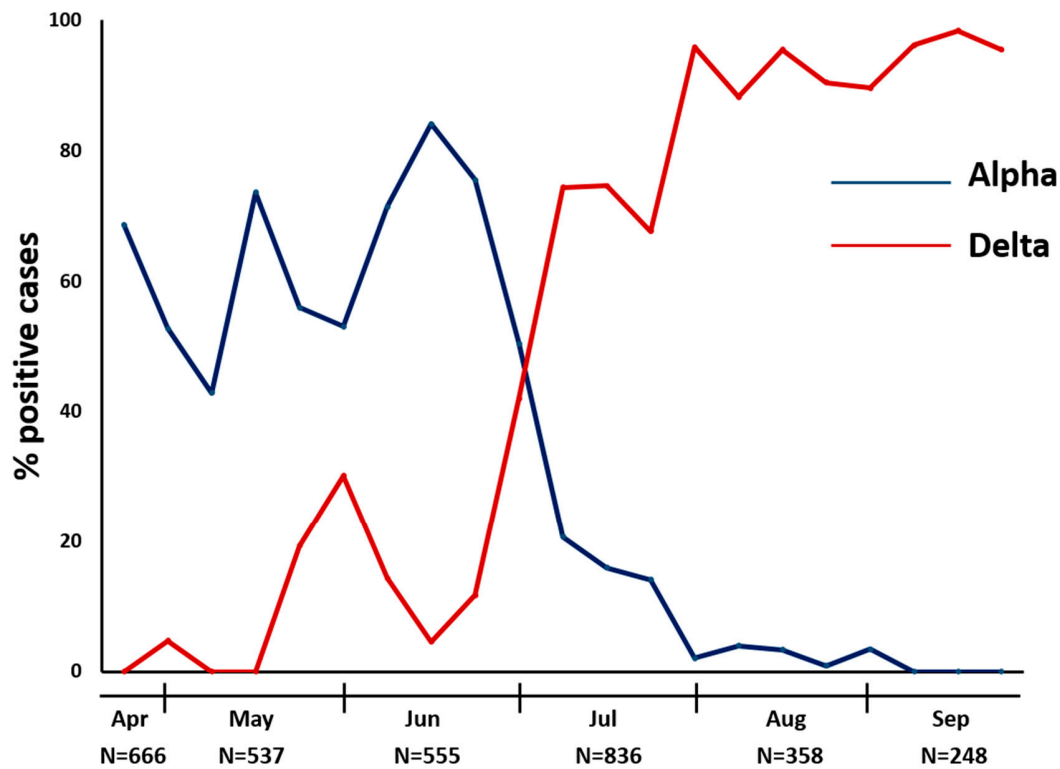

**Table S1.** Binding antibody levels including total anti-RBD Ig and anti-RBD IgG. Neutralizing activities of sera from the three groups were measured via surrogate virus neutralization tests.

|                          | CV+CV<br>( <i>n</i> = 170) | CV+CV+AZ<br>( <i>n</i> = 210) | CV+CV+INF<br>( <i>n</i> = 77) |
|--------------------------|----------------------------|-------------------------------|-------------------------------|
| Anti-RBD-Ig<br><i>n</i>  | 170                        | 210                           | 77                            |
| GMT (95% CI)             | 98 (83–116)                | 7947 (7277–8679)              | 19,698 (15335–25,302)         |
| Anti-RBD IgG<br><i>n</i> | 170                        | 210                           | 77                            |
| GMT (95% CI)             | 128 (114–144)              | 1492 (1367–1629)              | 3946 (3135–4965)              |
| sVNT-wuhan<br><i>n</i>   | 36                         | 36                            | 77                            |
| Median (IQR)             | 66.6 (48.9–79.4)           | 97.7 (97.0–97.8)              | 97.5 (97.3–97.6)              |

|                                                       |                        |                        |                        |
|-------------------------------------------------------|------------------------|------------------------|------------------------|
| sVNT-B.1.1.7<br>(alpha)<br><i>n</i><br>Median (IQR)   | 36<br>42.1 (29.0–58.3) | 36<br>97.2 (94.7–97.7) | 78<br>97.7 (97.3–98.0) |
| sVNT-B.1.351 (beta)<br><i>n</i><br>Median (IQR)       | 36<br>34.8 (20.5–47.3) | 36<br>92.9 (86.8–94.8) | 78<br>95.6 (93.9–96.2) |
| sVNT-B.1.617.2<br>(delta)<br><i>n</i><br>Median (IQR) | 36<br>48.9 (36.1–63.4) | 36<br>97.2 (95.6–97.9) | 78<br>97.9 (97.7–98.0) |

CI, confidence interval; CV+CV, fully vaccinated with two doses of CoronaVac; CV+CV+AZ, fully vaccinated with two doses of CoronaVac then administered a third vaccination with AZD1222; CV+CV+INF, fully vaccinated with two doses of CoronaVac followed by SARS-CoV-2 breakthrough infection; GMT, geometric mean titre; IQR, interquartile range; RBD, receptor-binding domain
